# Supplementary material
Source: publisher figshare collection journal article supplement (https://gsajournals.figshare.com/articles/dataset/_/8980337)
Supplement: Supplementary file 1 [file 1]

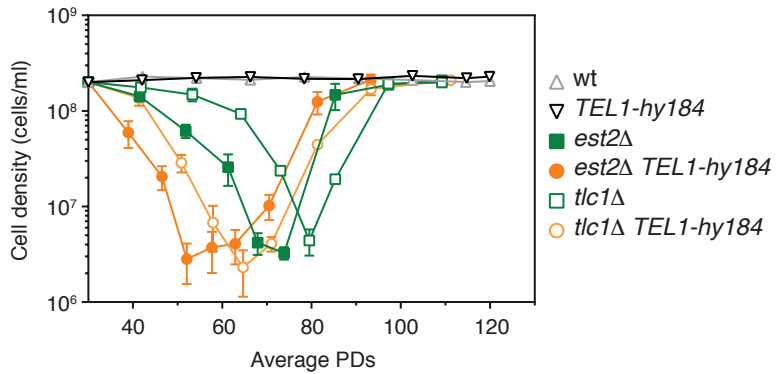

### Figure S2. Tel1-hy184 promotes precocious senescence in *tlc1Δ* cells

Senescence analysis was performed as described in figure S1A. The mean cell concentration of independent spores with the same genotype against the number of population doublings since tetrad dissection (PDs) was plotted in the graph. Error bars denote SD. *est2Δ*, n=4; *est2Δ TEL1-hy184*, n=4; *tlc1Δ*, n=4; *tlc1Δ TEL1-hy184*, n=4.
