# Supplementary material
Source: publisher figshare collection journal article supplement (https://gsajournals.figshare.com/articles/dataset/_/8980337)
Supplement: Supplementary file 3 [file 1]

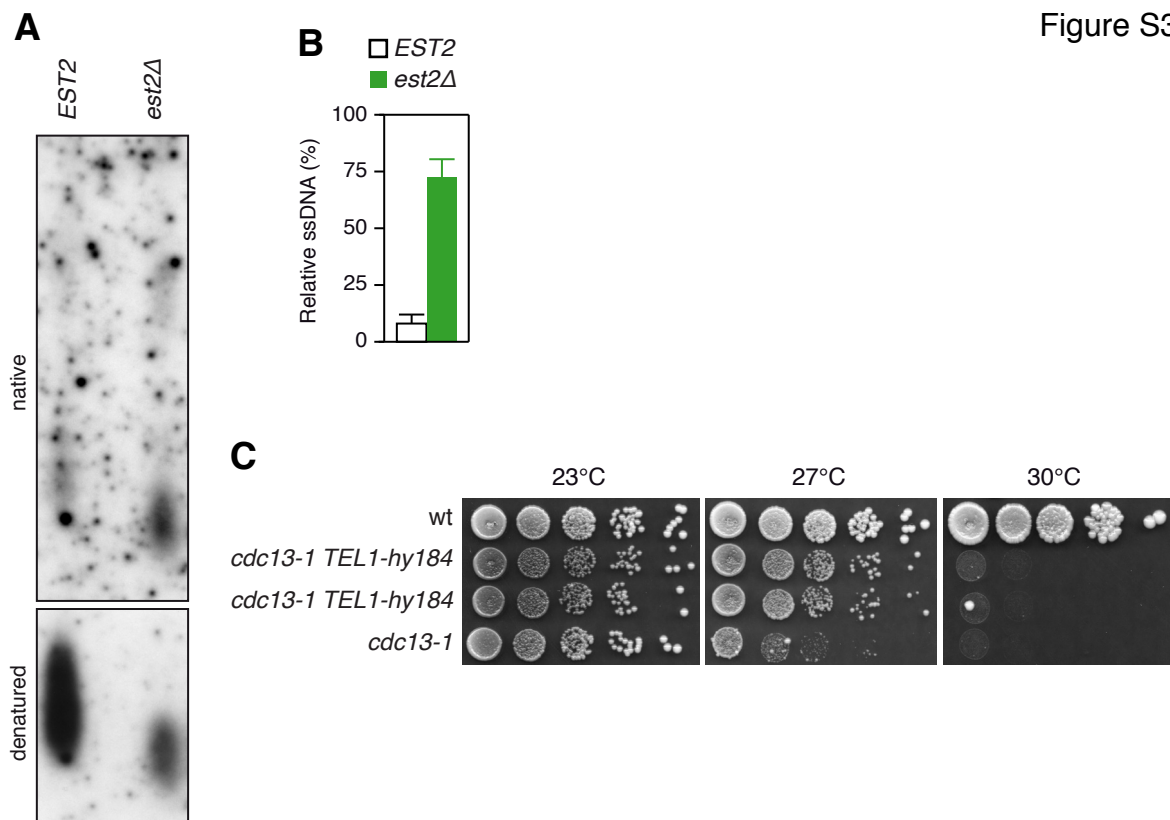

### Figure S3. Evaluation of ssDNA during senescence

(A-B) Senescence assays were performed as described in figure S1A. (A) *XhoI*-digested genomic DNA extracted from cell samples harvested 3 days after tetrad dissection (approximately 30 PDs) was subjected to non-denaturing in-gel hybridization using an end-labeled CA-rich oligonucleotide as a probe (native). The same gel was denatured and hybridized with the same CA-rich probe (denatured). (B) Densitometric analysis. The amount of native TG-ssDNA was normalized to the total amount of TG sequences for each sample. Plotted values are the mean value  $\pm$ SD from three independent experiments as in (A). (C) Exponentially growing cell cultures were serially diluted (1:10) and each dilution was spotted out onto YEPD plates, which were incubated at the indicated temperatures.
