# Supplementary material
Source: publisher figshare collection journal article supplement (https://gsajournals.figshare.com/articles/dataset/_/8980337)
Supplement: Supplementary file 4 [file 1]

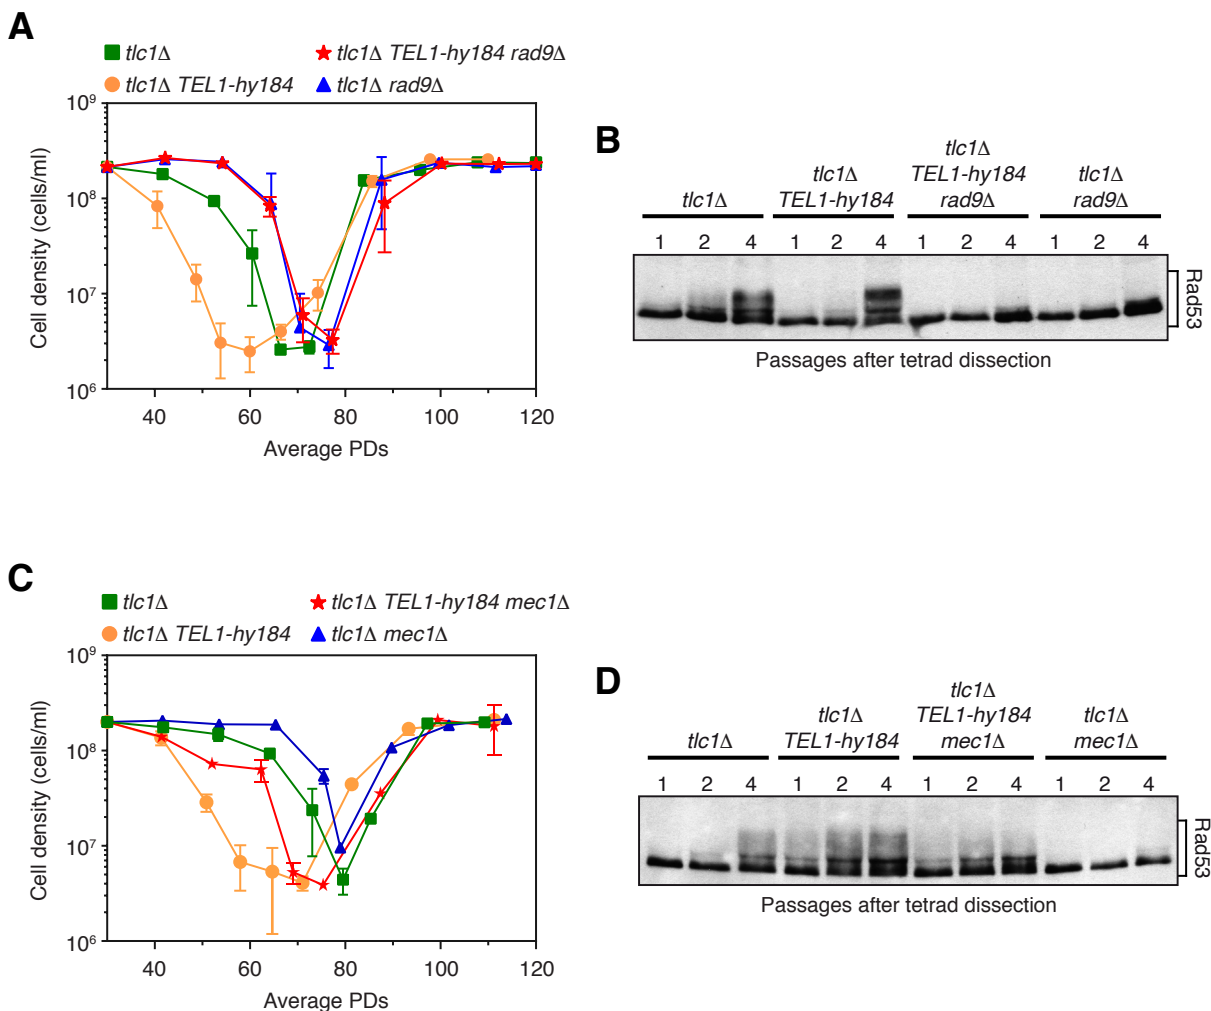

**Figure S4. Rad9 and partially Mec1 are responsible for anticipated senescence in *tlc1Δ TEL1-hy184* cells**

(A-D) Senescence assays were performed as described in figure S1A. (A and C) The mean cell concentration of at four independent clones with the same genotype against PDs was plotted. (B and D) Protein extracts prepared from cell samples harvested daily since the first passage in liquid medium (3 days after tetrad dissection, approximately 30 PDs) were analysed by western blot with anti-Rad53 antibodies
